# Supplementary material for: Identification of Immune Infiltration and the Potential Biomarkers in Diabetic Peripheral Neuropathy through Bioinformatics and Machine Learning Methods
Source: MDPI journal article supplement (doi:10.3390/biom13010039), 2022-12-26
Supplement: s1 [file s1]

Supplementary Materials

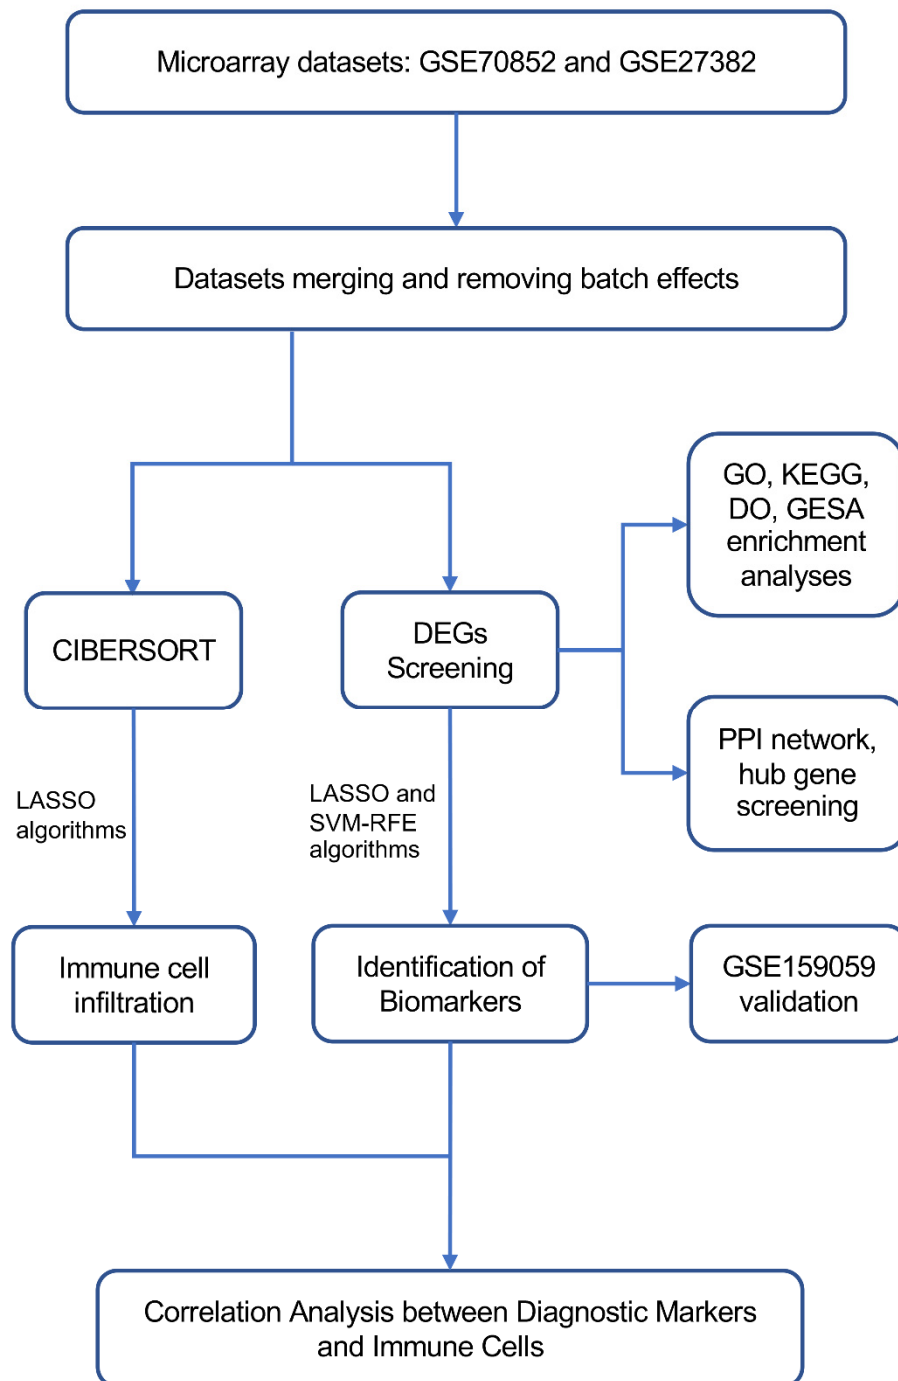

**Figure S1.** The flow diagram of this study.

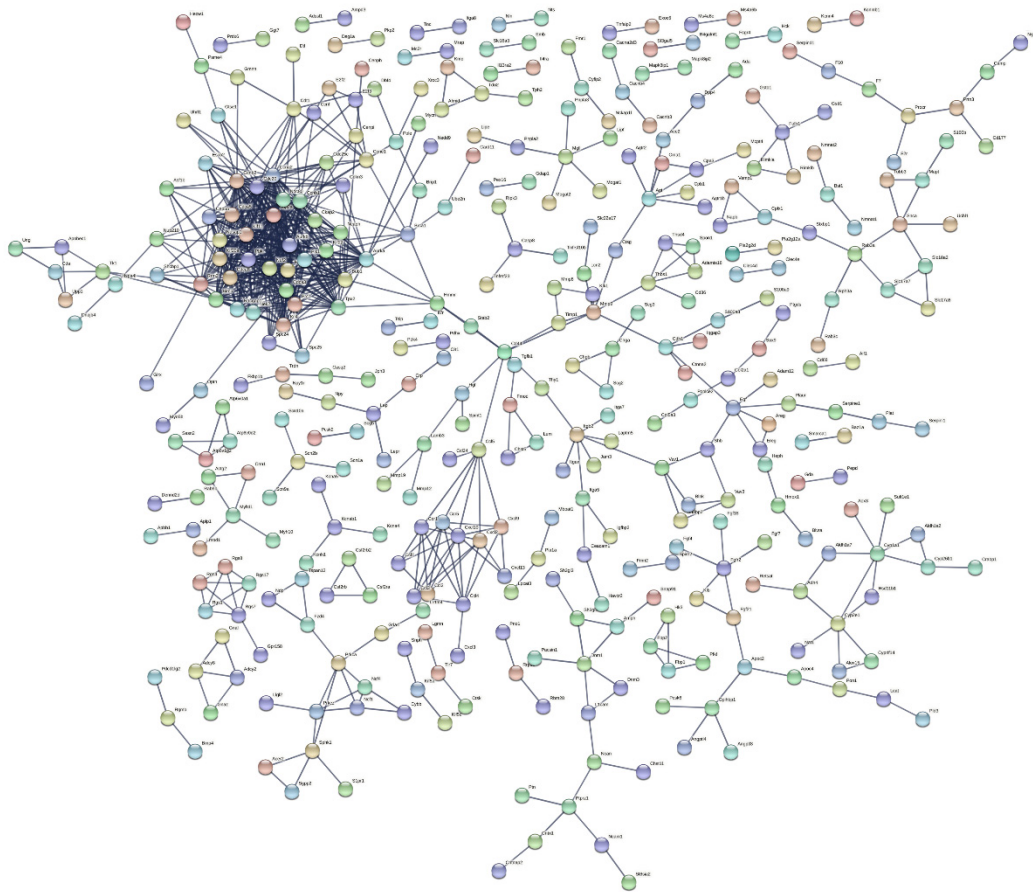

**Figure S2.** PPI network constructed using STRING database with interactions combined score  $> 0.9$  being used for network construction

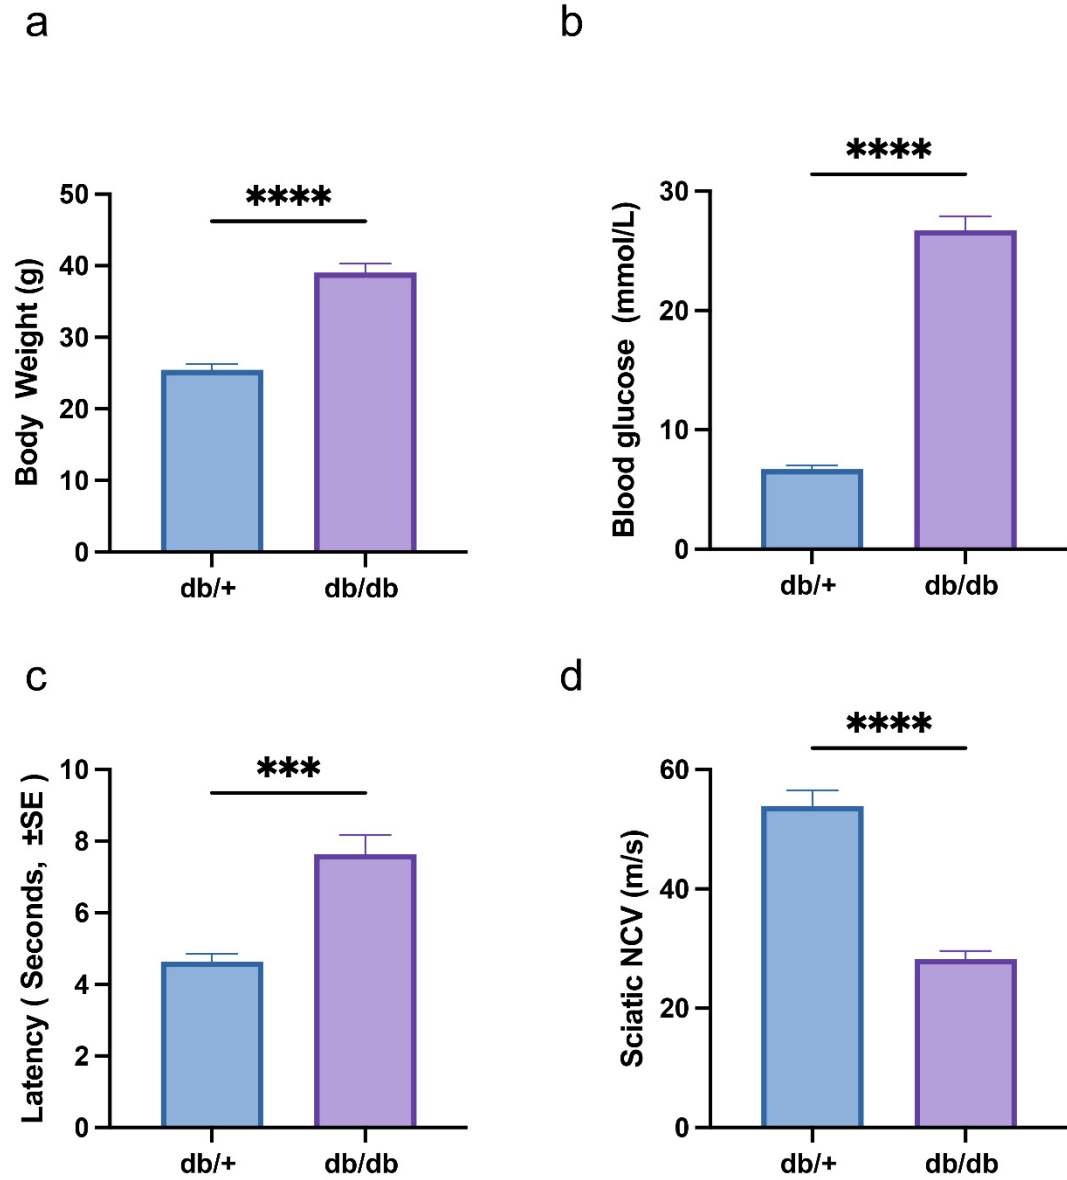

**Figure S3.** The metabolic phenotyping and neuropathy phenotyping in mice. **a** Body weight, **b** blood glucose, neurological function measured by **c** Hind paw withdrawal latency and **d** sciatic motor nerve conduction velocity (NCV), \*,  $p < 0.05$ , \*\*,  $p < 0.01$ , \*\*\*,  $p < 0.001$ , \*\*\*\*,  $p < 0.0001$ .

**Table S1.** Primers used for qRT-PCR in this study.

|                |         |                          |
|----------------|---------|--------------------------|
| UBD            | Forward | CCAATGGCGGTTAATGACCTT    |
|                | Reverse | TTTCGATGGGGCTTGAGGATT    |
| UCP1           | Forward | AGGCTTCCAGTACCATTAGGT    |
|                | Reverse | CTGAGTGAGGCAAAGCTGATTT   |
| LTBP2          | Forward | CTGCCCCAGTGGTCAAGGTTA    |
|                | Reverse | GCACTATGTTGAGGCATCGGC    |
| CCL2           | Forward | TTAAAAACCTGGATCGGAACCAA  |
|                | Reverse | GCATTAGCTTCAGATTACGGGT   |
| S100A8         | Forward | AAATCACCATGCCCTCTACAAG   |
|                | Reverse | CCCACCTTTATCACCATCGCAA   |
| HSPB7          | Forward | GAGCATGTTTTTCAGACGACTTTG |
|                | Reverse | CCGAGGGTCTTGATGTTTCCTT   |
| GPNMB          | Forward | TGCCAAGCGATTTTCGTGATGT   |
|                | Reverse | GCCACGTAATTGGTTGTGCTC    |
| MMP9           | Forward | AACCTCCAACCTCACGGACAC    |
|                | Reverse | GGTCCCACCTGAGGCCTTTGA    |
| PON1           | Forward | TTGGCATTTCCTTGATGGCA     |
|                | Reverse | ATTCGAAGCACCTCTGAGCCG    |
| CYP2F2         | Forward | AAAGGGGAGGAGTTCAGTGGC    |
|                | Reverse | GGATCTTCCAGCGCTCTCCAT    |
| CDH1           | Forward | ACTGCCAACTGGCTGGAGATT    |
|                | Reverse | GTGGGTCCTCTGGCAGAACT     |
| TUBB3          | Forward | GCGGCAACTATGTAGGGGACT    |
|                | Reverse | ATAGTGCCCTTTGGCCCAGTT    |
| MYT1L          | Forward | TGGTCACGTCAGTGGCAAATA    |
|                | Reverse | TGCAAATGGTTTTTCGCTTGGG   |
| CAANB4         | Forward | TACCTGCATGGAGTTGAAGACT   |
|                | Reverse | TTCGCTCTCTCAAGCTGGATA    |
| MGL2           | Forward | TTAGCCAATGTGCTTAGCTGG    |
|                | Reverse | GGCCTCCAATTCTTGAAACCT    |
| $\beta$ -actin | Forward | GCCTCCCAATCTCTCCATGCT    |
|                | Reverse | AGCTGGGCAGAGAAAGGGATG    |
